# Supplementary material for: Analysis of Maternal Prenatal Weight and Offspring Cognition and Behavior: Results From the Promotion of Breastfeeding Intervention Trial (PROBIT) Cohort
Source: PubMed Central journal article supplement (PMC8377565; doi:10.1001/jamanetworkopen.2021.21429), 2021-08-19

## Supplemental Online Content

Oken E, Thompson JW, Rifas-Shiman SL, et al. Analysis of Maternal Prenatal Weight and Offspring Cognition and Behavior: Results From the Promotion of Breastfeeding Intervention Trial (PROBIT) Cohort. *JAMA Netw Open*. 2021;4(8):e2121429. doi:10.1001/jamanetworkopen.2021.21429

**eTable 1.** Characteristics of PROBIT Participants Included vs Excluded From the Present Analysis

**eTable 2.** Correlations of Maternal, Paternal, and Child BMI Measures at Different Timepoints

**eTable 3.** Adjusted Associations of Late Pregnancy Maternal BMI (Continuous, Per 5 kg/m<sup>2</sup>) With Child Cognitive and Behavioral Outcomes, by Sex

**eTable 4.** Associations of Paternal BMI (Continuous, Per 5 kg/m<sup>2</sup>), Assessed at 6.5 Years Postpartum by Maternal Report of Paternal Height and Weight, With Child Cognitive and Behavioral Outcomes

**eFigure.** Maternal and Paternal Occupation and Employment at Enrollment According to Quartiles of Maternal or Paternal BMI Assessed at Different Timepoints

This supplemental material has been provided by the authors to give readers additional information about their work.

**eTable 1.** Characteristics of PROBIT Participants Included vs Excluded From the Present Analysis

|                                       | Included<br>(N=11,276)    | Excluded<br>(N=5,770) |
|---------------------------------------|---------------------------|-----------------------|
| <b>Maternal characteristics</b>       | <b>Mean (SD) or N (%)</b> |                       |
| Age at delivery, years                |                           |                       |
| <20                                   | 1471 (13.1%)              | 908 (15.7%)           |
| 20-34                                 | 9355 (83.0%)              | 4590 (79.6%)          |
| >=35                                  | 450 (4.0%)                | 271 (4.7%)            |
| Education                             |                           |                       |
| Completed university                  | 1506 (13.4%)              | 810 (14.0%)           |
| Incomplete university                 | 5827 (51.7%)              | 2743 (47.5%)          |
| Completed Secondary                   | 3570 (31.7%)              | 1927 (33.4%)          |
| Incomplete secondary                  | 373 (3.3%)                | 290 (5.0%)            |
| Occupation                            |                           |                       |
| Nonmanual                             | 4923 (43.7%)              | 2316 (40.1%)          |
| Manual                                | 3817 (33.9%)              | 1817 (31.5%)          |
| Student                               | 321 (2.9%)                | 283 (4.9%)            |
| Unemployed                            | 2215 (19.6%)              | 1354 (23.5%)          |
| Late pregnancy BMI, kg/m <sup>2</sup> | 27.2 (3.8)                | 26.9 (3.8)            |
| <b>Paternal characteristics</b>       |                           |                       |
| Education                             |                           |                       |
| Completed university                  | 1381 (12.3%)              | 911 (15.8%)           |
| Incomplete university                 | 283 (2.5%)                | 172 (3.0%)            |
| Completed Secondary                   | 9029 (80.1%)              | 4285 (74.3%)          |
| Incomplete secondary                  | 224 (2.0%)                | 176 (3.1%)            |
| Missing                               | 359 (3.2%)                | 226 (3.9%)            |
| Occupation                            |                           |                       |
| Nonmanual                             | 3161 (28.0%)              | 1694 (29.4%)          |
| Manual                                | 6098 (54.1%)              | 2866 (49.7%)          |
| Student                               | 138 (1.2%)                | 98 (1.7%)             |
| Unemployed                            | 1431 (12.7%)              | 799 (13.8%)           |
| Unknown                               | 448 (4.0%)                | 313 (5.4%)            |
| <b>Participant Characteristics</b>    |                           |                       |
| Female                                | 5421 (48.1%)              | 2787 (48.3%)          |
| Birthweight (g)                       | 3444 (416)                | 3425 (425)            |
| Location of residence                 |                           |                       |
| East, urban                           | 3646 (32.3%)              | 1971 (34.2%)          |
| East, rural                           | 1446 (12.8%)              | 1260 (21.8%)          |
| West, urban                           | 2892 (25.7%)              | 1488 (25.8%)          |
| West, rural                           | 3292 (29.2%)              | 1051 (18.2%)          |

**eTable 2.** Correlations of Maternal, Paternal, and Child BMI Measures at Different Timepoints<sup>a</sup>

|                                  | Mother 1 <sup>st</sup><br>trimester<br>N=2,346 | Mother late<br>pregnancy<br>N=11,276 | Mother 6.5<br>years<br>N=10,455 | Mother 11.5<br>years<br>N=6,398 | Father 6.5<br>years<br>N=9,546 | Child<br>6.5 years<br>N=10,526 | Child<br>11.5 years<br>N=10,549 | Child<br>16 years<br>N=10,375 |
|----------------------------------|------------------------------------------------|--------------------------------------|---------------------------------|---------------------------------|--------------------------------|--------------------------------|---------------------------------|-------------------------------|
|                                  | Pearson correlation coefficient (r)            |                                      |                                 |                                 |                                |                                |                                 |                               |
| Mother 1 <sup>st</sup> trimester | 1                                              | 0.90                                 | 0.75                            | 0.74                            | 0.17                           | 0.24                           | 0.26                            | 0.28                          |
| Mother 3 <sup>rd</sup> trimester | 0.90                                           | 1                                    | 0.68                            | 0.70                            | 0.13                           | 0.22                           | 0.23                            | 0.24                          |
| Mother 6.5 years                 | 0.75                                           | 0.68                                 | 1                               | 0.76                            | 0.20                           | 0.18                           | 0.22                            | 0.23                          |
| Mother 11.5 years                | 0.74                                           | 0.70                                 | 0.76                            | 1                               | 0.13                           | 0.18                           | 0.25                            | 0.24                          |
| Father 6.5 years                 | 0.17                                           | 0.13                                 | 0.20                            | 0.13                            | 1                              | 0.18                           | 0.20                            | 0.18                          |
| Child 6.5 years                  | 0.24                                           | 0.22                                 | 0.18                            | 0.18                            | 0.18                           | 1                              | 0.68                            | 0.55                          |
| Child 11.5 years                 | 0.26                                           | 0.23                                 | 0.22                            | 0.25                            | 0.20                           | 0.68                           | 1                               | 0.70                          |
| Child 16 years                   | 0.28                                           | 0.24                                 | 0.23                            | 0.24                            | 0.18                           | 0.55                           | 0.70                            | 1                             |

<sup>a</sup> Limited to 11,276 with maternal late pregnancy BMI and any child cognitive/behavioral outcome

**eTable 3.** Adjusted Associations of Late Pregnancy Maternal BMI (Continuous, Per 5 Kg/M<sup>2</sup>) With Child Cognitive and Behavioral Outcomes, by Sex<sup>a</sup>

| Cognitive and behavioral outcomes      | Boys<br>N=5855 | Girls<br>N=5421 | Boys, Fully adjusted*                     | Girls, Fully adjusted* | Interaction P value<br>for sex |
|----------------------------------------|----------------|-----------------|-------------------------------------------|------------------------|--------------------------------|
| <b>WASI at 6.5 years</b>               | Mean (SD)      |                 | Effect estimate (95% confidence interval) |                        |                                |
| IQ full                                | 106.5 (16.4)   | 106.6 (15.6)    | -0.25 (-0.73, 0.23)                       | -0.31 (-0.79, 0.16)    | 0.71                           |
| IQ performance                         | 107.4 (15.6)   | 106.8 (14.9)    | -0.53 (-1.03, -0.03)                      | -0.54 (-1.03, -0.05)   | 0.61                           |
| IQ verbal                              | 104.3 (17.4)   | 104.9 (16.7)    | 0.02 (-0.49, 0.53)                        | -0.02 (-0.53, 0.49)    | 0.74                           |
| <b>SDQ parent report at 6.5 years</b>  |                |                 |                                           |                        |                                |
| Total                                  | 11.9 (5.0)     | 11.1 (4.9)      | 0.14 (-0.04, 0.33)                        | -0.03 (-0.22, 0.15)    | 0.87                           |
| Internalizing                          | 5.1 (3.0)      | 5.3 (3.0)       | 0.03 (-0.08, 0.14)                        | 0.03 (-0.09, 0.14)     | 0.25                           |
| Externalizing                          | 6.7 (3.3)      | 5.8 (3.1)       | 0.12 (-0.01, 0.23)                        | -0.06 (-0.18, 0.06)    | 0.18                           |
| Prosocial                              | 8.1 (1.7)      | 8.5 (1.6)       | -0.01 (-0.07, 0.05)                       | 0.07 (0.01, 0.13)      | 0.06                           |
| <b>SDQ teacher report at 6.5 years</b> |                |                 |                                           |                        |                                |
| SDQ total                              | 10.6 (6.0)     | 8.3 (5.3)       | 0.30 (0.07, 0.53)                         | -0.04 (-0.26, 0.18)    | 0.26                           |
| Internalizing                          | 4.4 (3.1)      | 4.2 (3.0)       | 0.02 (-0.10, 0.15)                        | -0.01 (-0.13, 0.12)    | 0.82                           |
| Externalizing                          | 6.2 (4.2)      | 4.1 (3.5)       | 0.28 (0.12, 0.44)                         | -0.03 (-0.39, 0.61)    | 0.07                           |
| Prosocial                              | 7.0 (2.3)      | 8.0 (2.0)       | -0.07 (-0.16, 0.02)                       | 0.04 (-0.04, 0.12)     | 0.15                           |
| <b>Neurotrax at 16 years</b>           |                |                 |                                           |                        |                                |
| Standardized score                     | 99.6 (15.4)    | 100.6 (14.2)    | -0.69 (-1.25, -0.14)                      | -0.62 (-1.15, -0.09)   | 0.43                           |
| Attention                              | 99.5 (15.5)    | 100.7 (14.1)    | -0.74 (-1.31, -0.17)                      | -0.72 (-1.26, -0.18)   | 0.57                           |
| Executive function                     | 100.8 (15.0)   | 99.6 (14.5)     | -0.63 (-1.18, -0.08)                      | -0.34 (-0.89, 0.22)    | 0.19                           |
| Processing speed                       | 99.0 (15.6)    | 100.7 (14.0)    | -0.71 (-1.31, -0.11)                      | -0.40 (-0.96, 0.16)    | 0.19                           |
| Memory                                 | 98.4 (15.9)    | 101.6 (13.7)    | -0.22 (-0.81, 0.37)                       | -0.64 (-1.17, -0.10)   | 0.47                           |
| Motor skills                           | 103.1 (13.8)   | 97.2 (15.0)     | -0.23 (-0.75, 0.28)                       | 0.16 (-0.43, 0.75)     | 0.27                           |
| Verbal function                        | 97.9 (15.6)    | 102.0 (14.0)    | -0.66 (-1.24, -0.08)                      | -0.55 (-1.09, -0.01)   | 0.71                           |
| Visual/spatial                         | 100.7 (15.3)   | 99.3 (14.5)     | -0.13 (-0.69, 0.44)                       | -0.26 (-0.82, 0.30)    | 0.77                           |
| <b>National examination scores</b>     |                |                 |                                           |                        |                                |
| 19-year scores                         | 6.4 (1.1)      | 7.0 (1.1)       | -0.02 (-0.08, 0.04)                       | -0.06 (-0.13, 0.02)    | 0.53                           |
| 11-year scores                         | 7.8 (1.1)      | 8.3 (1.0)       | -0.09 (-0.15, -0.04)                      | -0.02 (-0.06, 0.03)    | 0.01                           |

<sup>a</sup> Results from mixed effects linear regression models corrected for clustering within polyclinics and adjusted for geographic location, maternal age, height, and smoking; maternal and paternal education and occupation; number of older siblings; and treatment group

BMI = body mass index; IQ = intelligence quotient; SDQ = Strengths and Difficulties Questionnaire; WASI = Wechsler Abbreviated Scales of Intelligence

**eTable 4.** Associations of Paternal BMI (Continuous, Per 5 kg/m<sup>2</sup>), Assessed at 6.5 Years Postpartum by Maternal Report of Paternal Height and Weight, With Child Cognitive and Behavioral Outcomes

| Cognitive and behavioral outcomes      | Unadjusted                                | Adjusted*           | Adjusted + late pregnancy maternal BMI |
|----------------------------------------|-------------------------------------------|---------------------|----------------------------------------|
| <b>WASI at 6.5 years</b>               | Effect estimate (95% Confidence Interval) |                     |                                        |
| IQ Full                                | 0.64 (0.24, 1.03)                         | 0.16 (-0.22, 0.54)  | 0.21 (-0.18, 0.60)                     |
| IQ Performance                         | 0.24 (-0.16, 0.63)                        | -0.15 (-0.54, 0.23) | -0.06 (-0.47, 0.34)                    |
| IQ Verbal                              | 0.88 (0.46, 1.29)                         | 0.42 (0.02, 0.82)   | 0.42 (0.00, 0.83)                      |
| <b>SDQ parent report at 6.5 years</b>  |                                           |                     |                                        |
| SDQ total                              | -0.23 (-0.37,-0.09)                       | -0.17 (-0.31,-0.02) | -0.17 (-0.32,-0.02)                    |
| Internalizing                          | -0.10 (-0.18,-0.01)                       | -0.08 (-0.16, 0.01) | -0.07 (-0.16, 0.02)                    |
| Externalizing                          | -0.13 (-0.22,-0.04)                       | -0.09 (-0.18, 0.00) | -0.10 (-0.19, 0.00)                    |
| Prosocial                              | 0.02 (-0.02, 0.07)                        | 0.01 (-0.04, 0.06)  | 0.01 (-0.04, 0.06)                     |
| <b>SDQ teacher report at 6.5 years</b> |                                           |                     |                                        |
| SDQ total                              | -0.37 (-0.54,-0.19)                       | -0.29 (-0.46,-0.11) | -0.31 (-0.49,-0.13)                    |
| Internalizing                          | -0.13 (-0.22,-0.04)                       | -0.11 (-0.21,-0.02) | -0.11 (-0.21,-0.02)                    |
| Externalizing                          | -0.24 (-0.36,-0.11)                       | -0.18 (-0.29,-0.06) | -0.20 (-0.32,-0.07)                    |
| Prosocial                              | 0.12 (0.05, 0.19)                         | 0.09 (0.02, 0.16)   | 0.09 (0.02, 0.16)                      |
| <b>Neurotrax at 16 years</b>           |                                           |                     |                                        |
| Standardized score                     | 0.66 (0.21, 1.10)                         | 0.35 (-0.08, 0.79)  | 0.45 (0.00, 0.90)                      |
| Attention                              | 0.16 (-0.29, 0.60)                        | -0.07 (-0.52, 0.38) | 0.06 (-0.40, 0.52)                     |
| Executive function                     | 0.89 (0.45, 1.34)                         | 0.68 (0.24, 1.12)   | 0.75 (0.29, 1.20)                      |
| Processing speed                       | -0.09 (-0.56, 0.37)                       | -0.33 (-0.80, 0.14) | -0.21 (-0.69, 0.28)                    |
| Memory                                 | 0.43 (-0.02, 0.88)                        | 0.27 (-0.18, 0.72)  | 0.34 (-0.13, 0.81)                     |
| Motor skills                           | 1.01 (0.56, 1.46)                         | 0.79 (0.35, 1.23)   | 0.73 (0.28, 1.19)                      |
| Verbal function                        | 0.26 (-0.18, 0.71)                        | 0.06 (-0.39, 0.51)  | 0.15 (-0.32, 0.61)                     |
| Visual/spatial                         | 0.55 (0.10, 1.00)                         | 0.32 (-0.13, 0.77)  | 0.37 (-0.10, 0.84)                     |
| <b>National examination scores</b>     |                                           |                     |                                        |
| 9-year exam scores                     | 0.09 (0.03, 0.14)                         | 0.06 (0.01, 0.12)   | 0.07 (0.02, 0.13)                      |
| 11-year exam scores                    | 0.06 (0.02, 0.11)                         | 0.04 (0.00, 0.08)   | 0.05 (0.01, 0.09)                      |

\* Results from mixed effects linear regression models corrected for clustering within polyclinics and adjusted for geographic location, maternal age, height, and smoking; maternal and paternal education and occupation; number of older siblings; child sex; and treatment group

**eFigure.** Maternal and Paternal Occupation and Employment at Enrollment According to Quartiles of Maternal or Paternal BMI Assessed at Different Timepoints

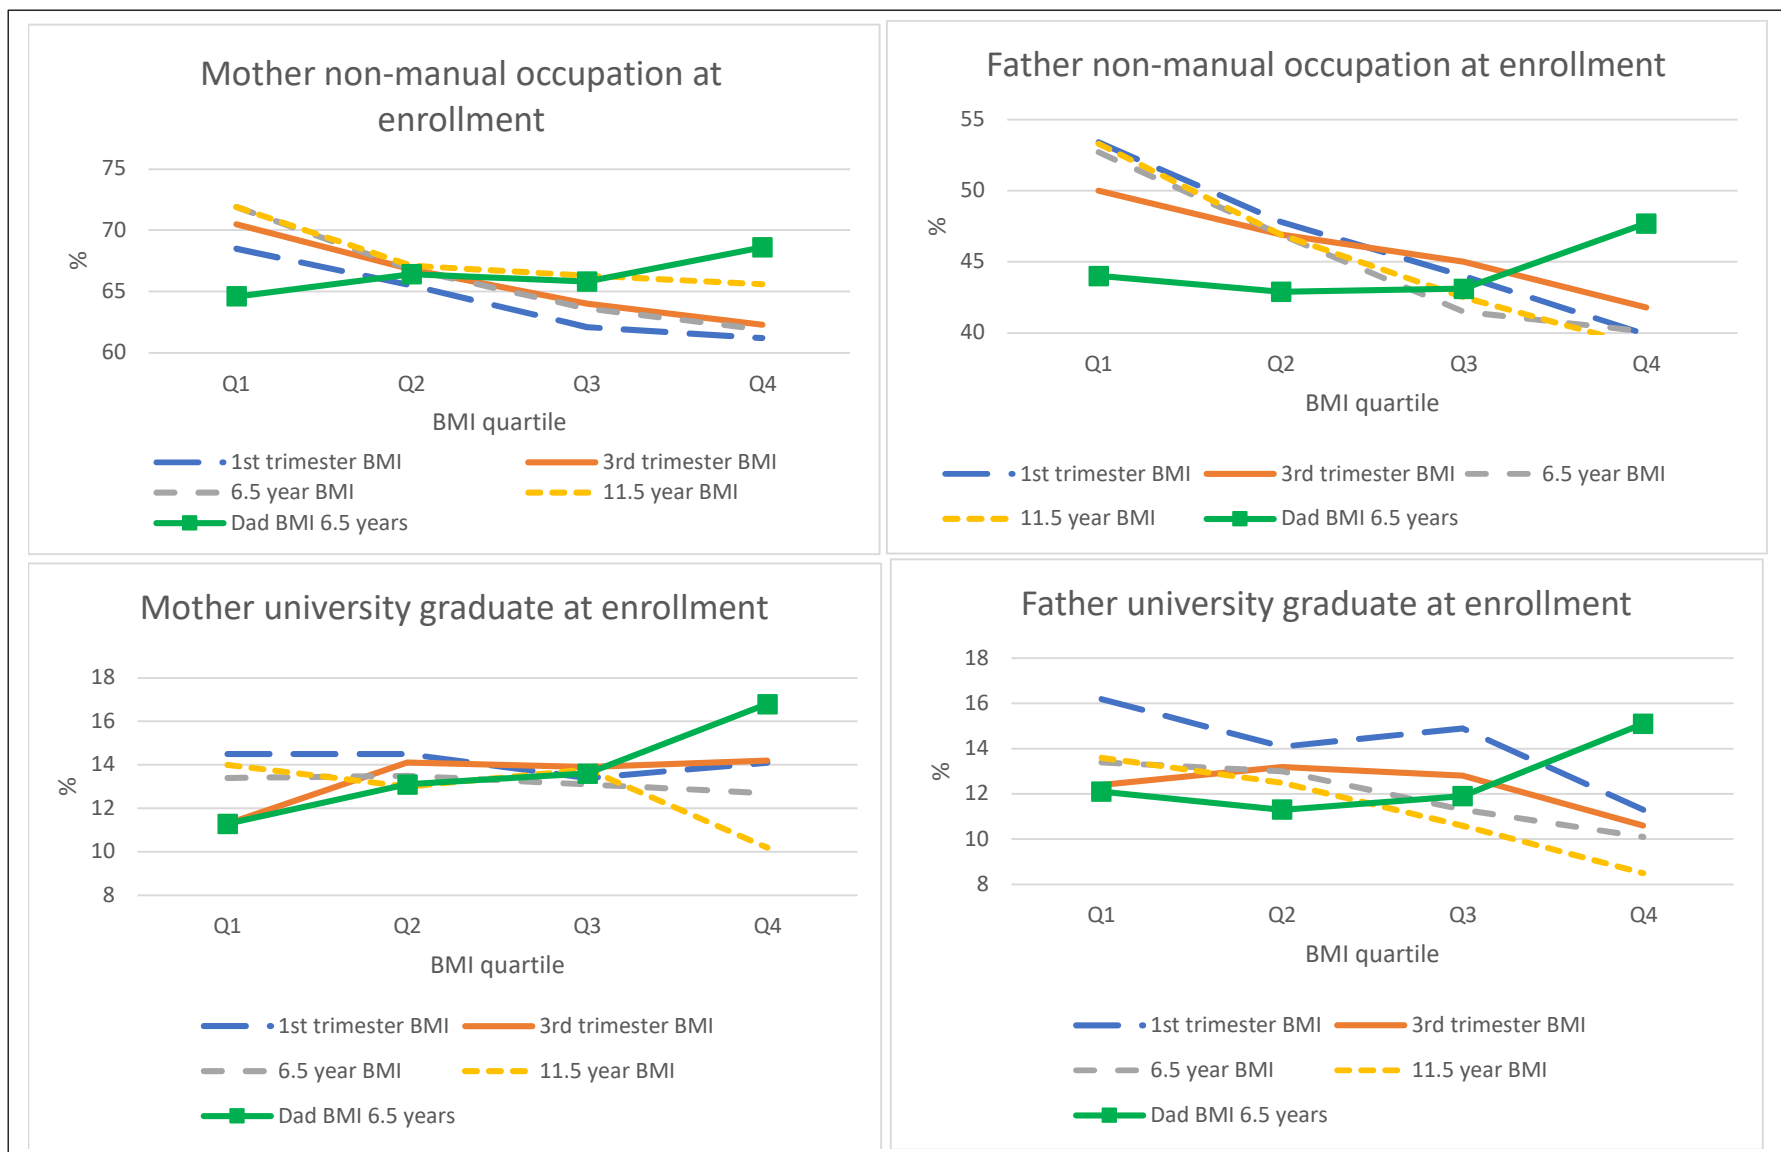

Supplement: jamanetwopen-e2121429-s001.pdf [file jamanetwopen-e2121429-s001.pdf]
